# Supplementary material for: Transforming Mo0.5W0.5O3 to MoS2: leveraging selective sulfurization for enhanced electrocatalysis
Source: Royal Society of Chemistry journal article supplement (doi:10.1039/d4tc04102j), 2025-01-01
Supplement: d4tc04102j1.pdf [file d4tc04102j1.pdf]

## Supporting Information

### **Transforming $\text{Mo}_{0.5}\text{W}_{0.5}\text{O}_3$ to $\text{MoS}_2$ : Leveraging Selective Sulfurization for Enhanced Electrocatalysis**

Naveen Goyal <sup>a</sup>, Gokul Raj <sup>a</sup>, Karuna Kar Nanda <sup>a</sup>, and N. Ravishankar <sup>a,\*</sup>

<sup>a</sup> Materials Research Centre, Indian Institute of Science, Bangalore-560012, India

\*Corresponding author: [nravi@iisc.ac.in](mailto:nravi@iisc.ac.in)

**Table S1.** Lattice parameters of hydrated  $\text{WO}_3$ ,  $\text{MoO}_3$  and  $\text{W}_{0.5}\text{Mo}_{0.5}\text{O}_3$ .

| Compound                                                               | Lattice Parameters |       |       |
|------------------------------------------------------------------------|--------------------|-------|-------|
|                                                                        | a (Å)              | b (Å) | c (Å) |
| $\text{WO}_3 \cdot 0.33\text{H}_2\text{O}$                             | 7.35               | 12.51 | 7.70  |
| $\text{MoO}_3 \cdot 0.33\text{H}_2\text{O}$                            | 7.33               | 12.67 | 7.69  |
| $\text{W}_{0.5}\text{Mo}_{0.5}\text{O}_3 \cdot 0.33\text{H}_2\text{O}$ | 7.34               | 12.59 | 7.695 |

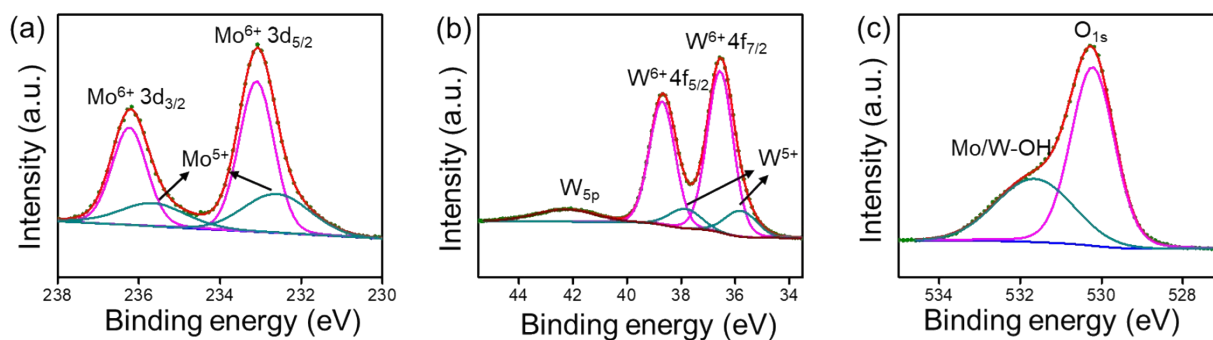

**Figure S1.** XPS spectra of (a) Mo 3d, (b) W 4f, and (c) O 1s of template  $\text{W}_{0.5}\text{Mo}_{0.5}\text{O}_3 \cdot 0.33\text{H}_2\text{O}$ .

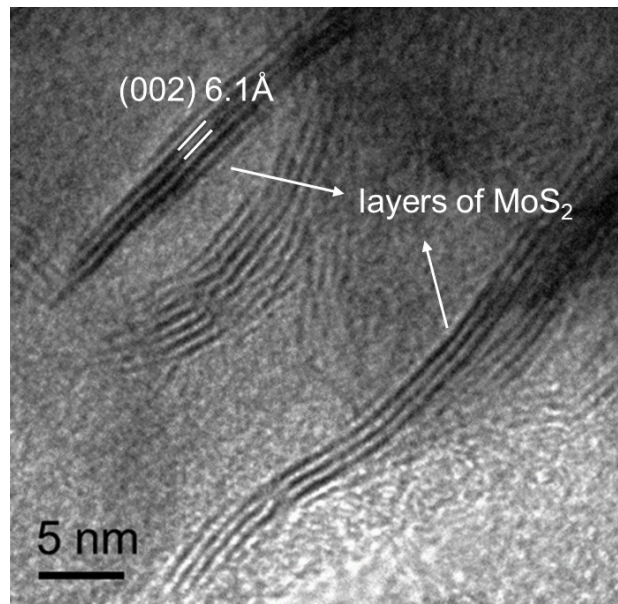

**Figure S2** High resolution TEM micrograph showing layers of MoS<sub>2</sub> in final selectively sulfurized product.

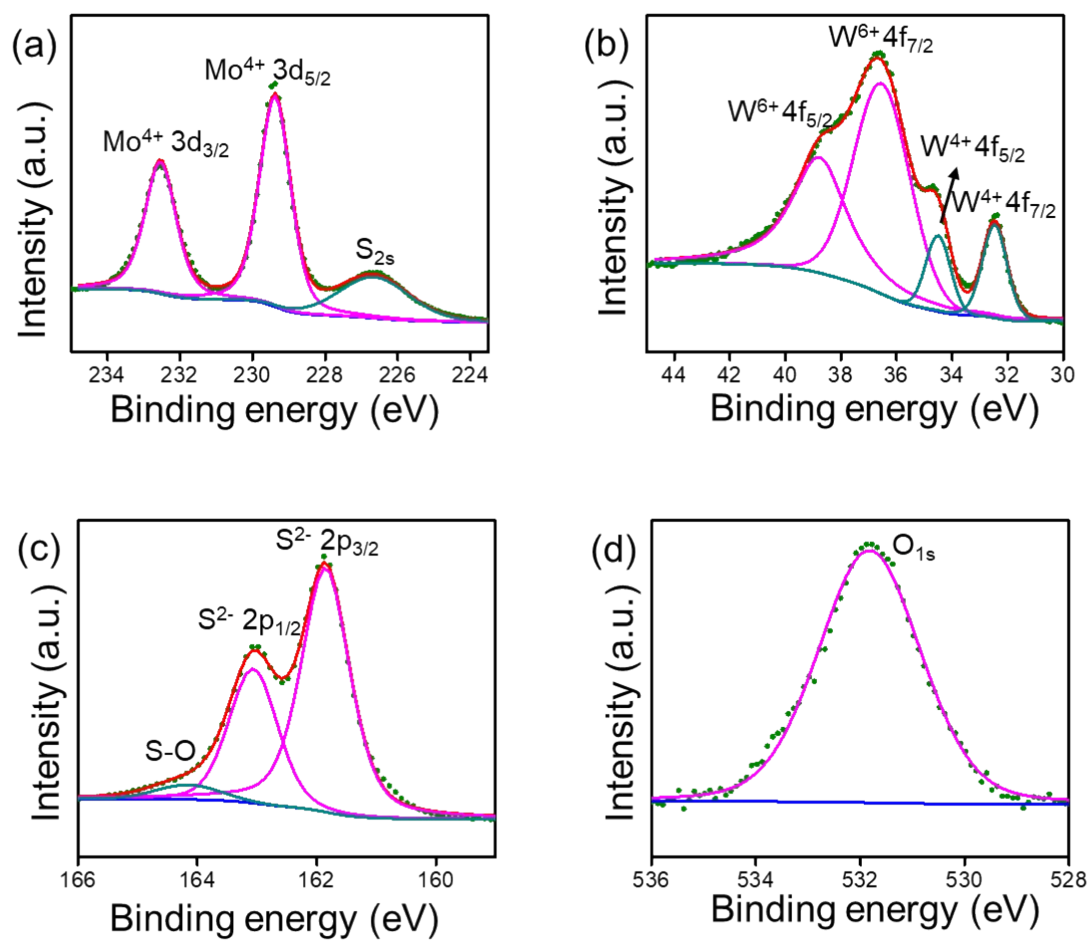

**Figure S3.** High resolution XPS spectra of (a) Mo 3d, (b) W 4f, (c) S 2p, and (d) O 1s of final selective sulfurized product.

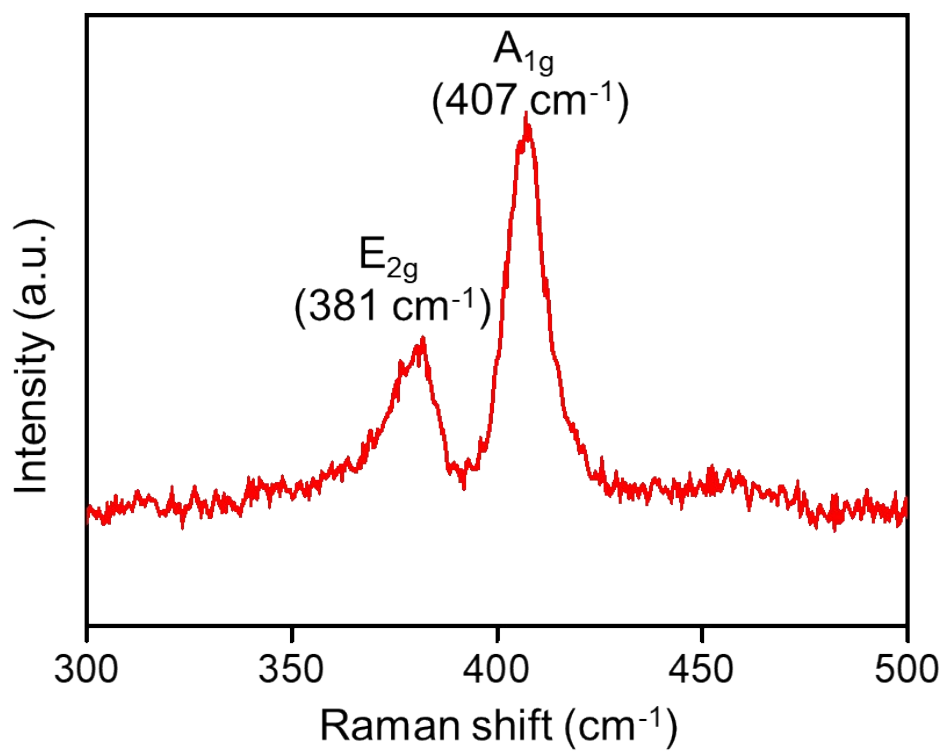

**Figure S4:** Raman spectra of selective sulfurized product depicting formation of only MoS<sub>2</sub>.

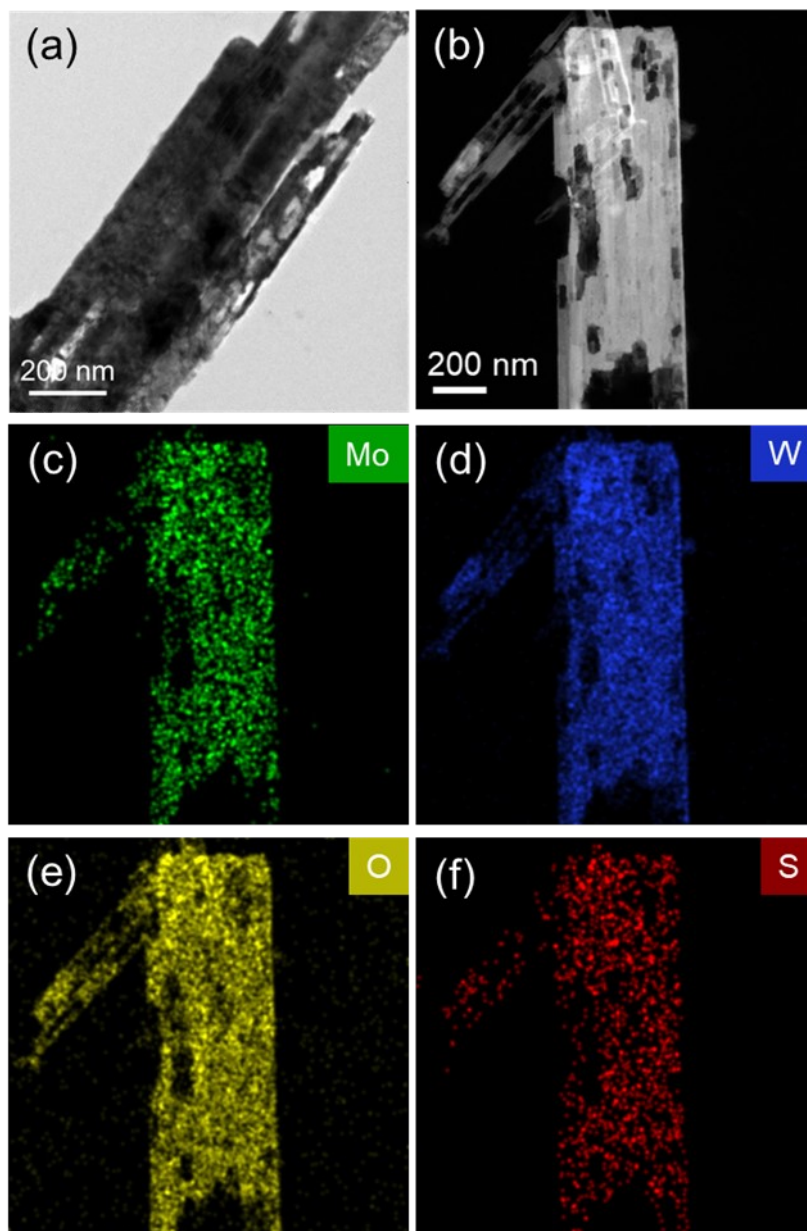

**Figure S5.** Time dependent experiment; **(a)** BF-TEM micrograph of 3 h sulfurized product, **(b)** corresponding HAADF-STEM micrograph and EDS maps showing elemental distribution of Mo **(c)**, W **(d)**, O **(e)**, and S **(f)**, respectively.

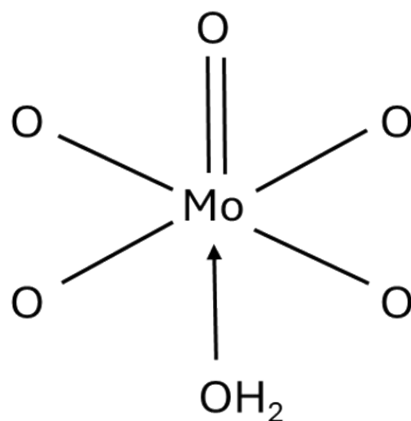

**Figure S6.** Structural arrangement of Mo in octahedral environment of O and H<sub>2</sub>O in pristine W<sub>0.5</sub>Mo<sub>0.5</sub>O<sub>3</sub> · 0.33H<sub>2</sub>O.

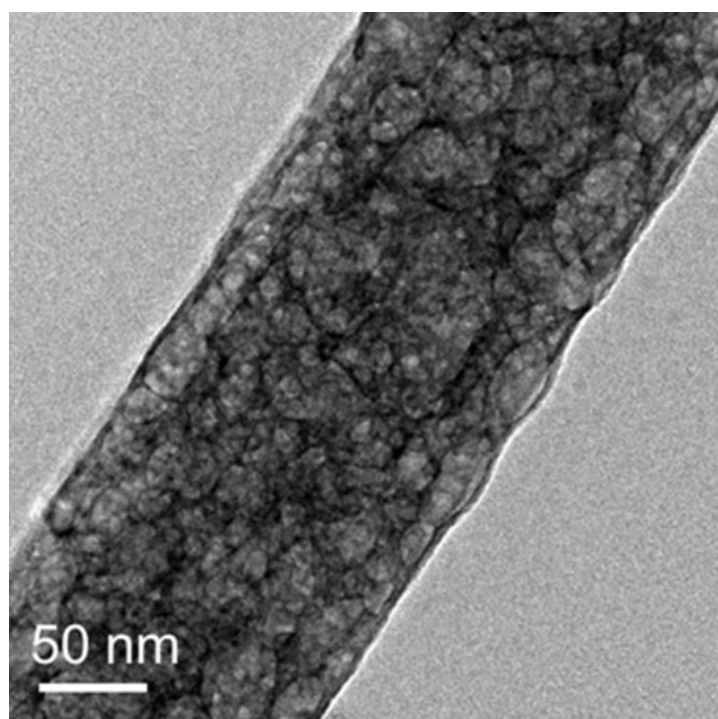

**Figure S7.** BF-TEM micrograph of 6 h sulfurized product showing formation of MoS<sub>2</sub>-WO<sub>3</sub> heterostructure.

**Table S2.** Calculated binding energies and % abundance of various oxidation states of Mo in XPS analysis of 6 h sulfurized product.

| <b>Mo</b>         | <b>Oxidation state</b> | <b>Binding energy (eV)</b> | <b>Peak area</b> | <b>Total area of each oxidation state</b> | <b>% abundance of each oxidation state</b> |
|-------------------|------------------------|----------------------------|------------------|-------------------------------------------|--------------------------------------------|
| 3d <sub>3/2</sub> | +6                     | 236.0                      | 26489            | 66624                                     | 51.3                                       |
| 3d <sub>5/2</sub> |                        | 232.9                      | 40135            |                                           |                                            |
| 3d <sub>3/2</sub> | +4                     | 234.6                      | 25170            | 63306                                     | 48.7                                       |
| 3d <sub>5/2</sub> |                        | 231.5                      | 38136            |                                           |                                            |



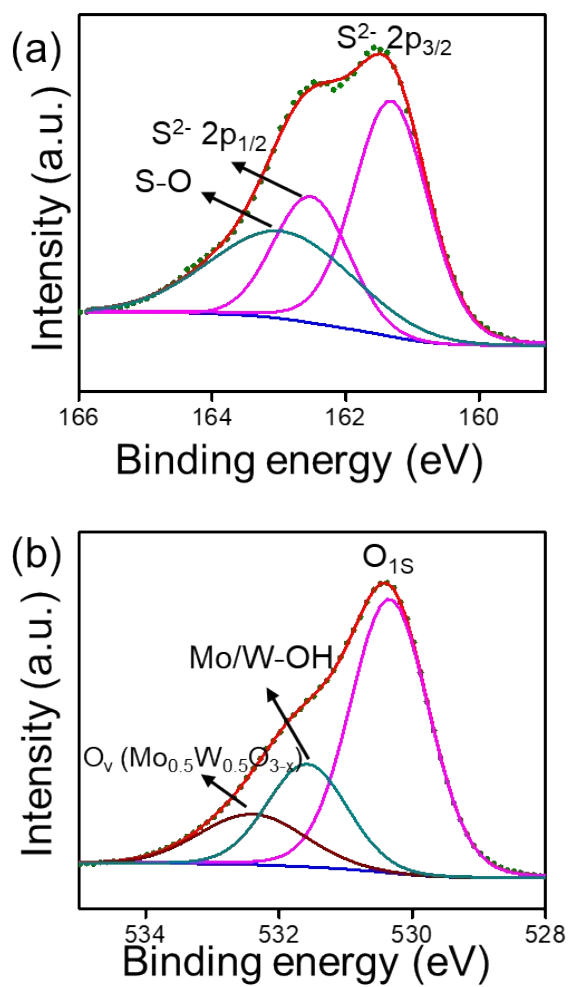

**Figure S8.** High resolution XPS spectra of (a) S 2p, and (b) O 1s of 6 h sulfurized product.

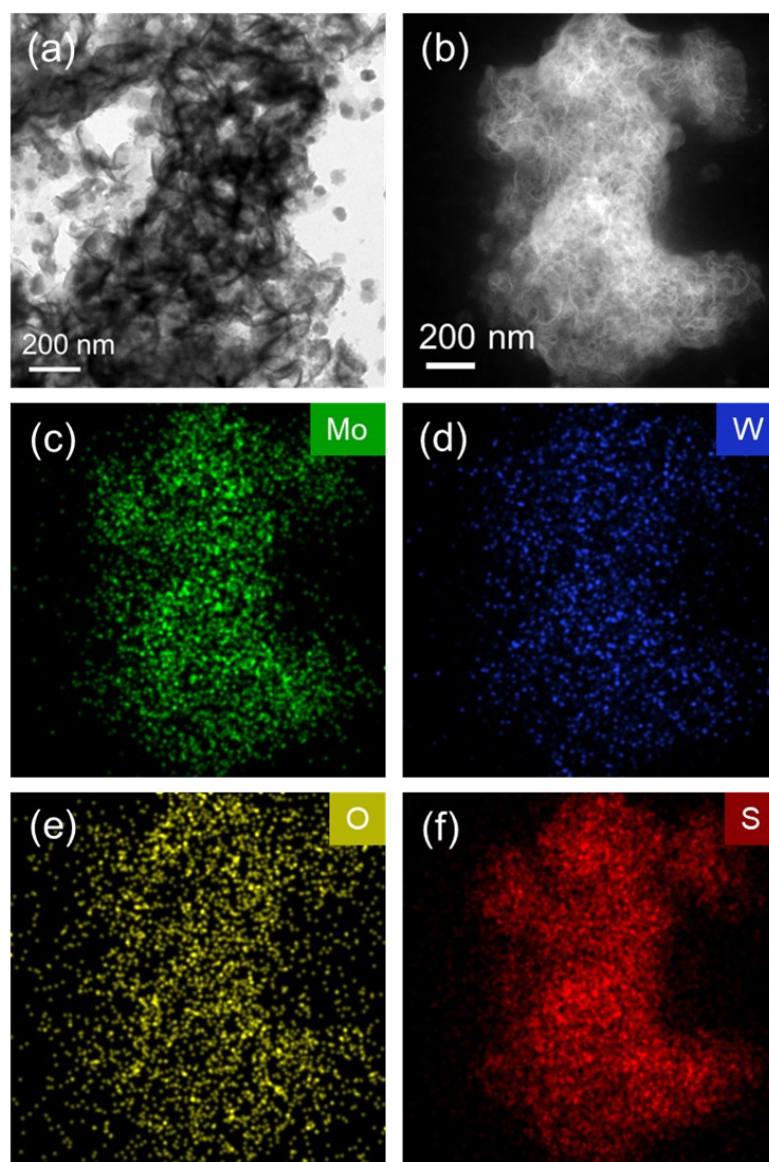

**Figure S9.** Time dependent experiment; **(a)** BF-TEM micrograph of 12 h sulfurized product, **(b)** corresponding HAADF-STEM micrograph and EDS maps showing elemental distribution of Mo **(c)**, W **(d)**, O **(e)**, and S **(f)**, respectively.

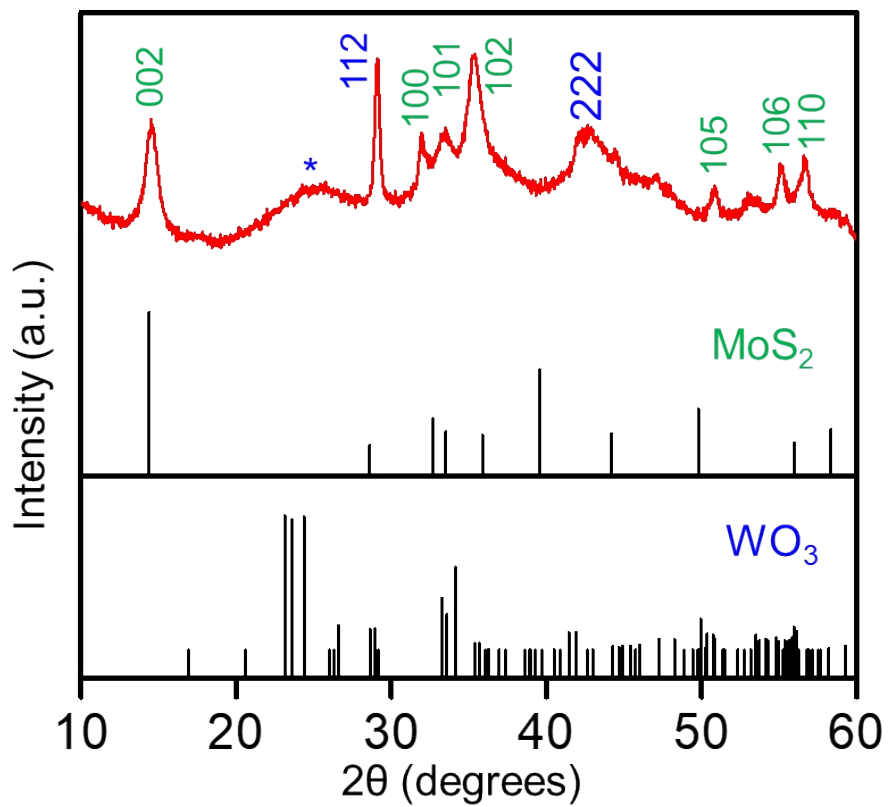

**Figure S10.** PXRD pattern of 12 h sulfurized product depicting co-existence of MoS<sub>2</sub> (major) and WO<sub>3</sub> (minor).

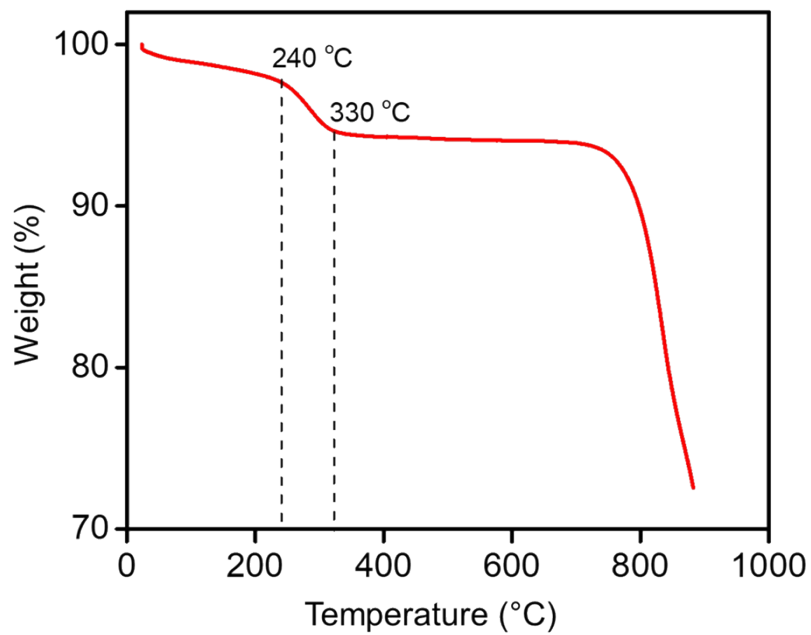

**Figure S11:** TGA plot of template  $W_{0.5}Mo_{0.5}O_3 \cdot 0.33H_2O$ .

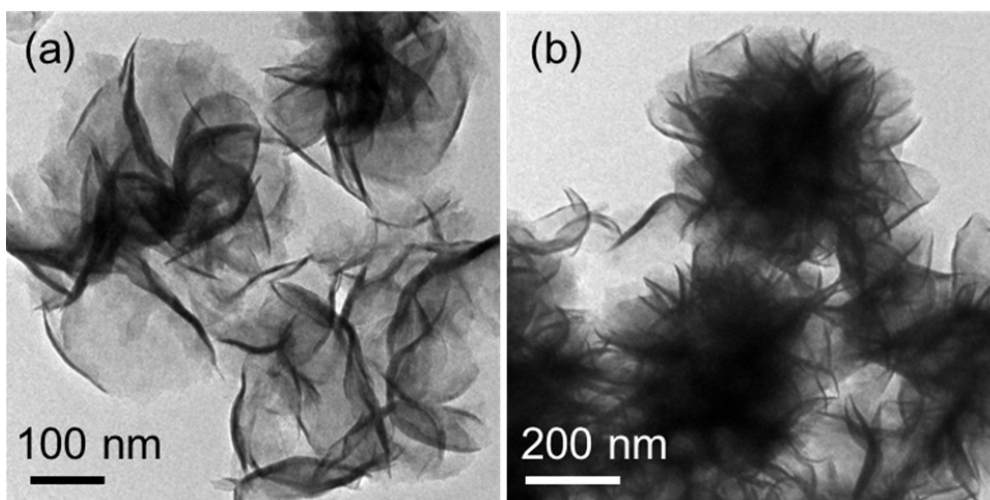

**Figure S12.** BF-TEM micrograph showing variation in size of  $MoS_2$  obtained using (a) hydrated  $W_{0.5}Mo_{0.5}O_3$ , and (b) non-hydrated  $W_{0.5}Mo_{0.5}O_3$ .

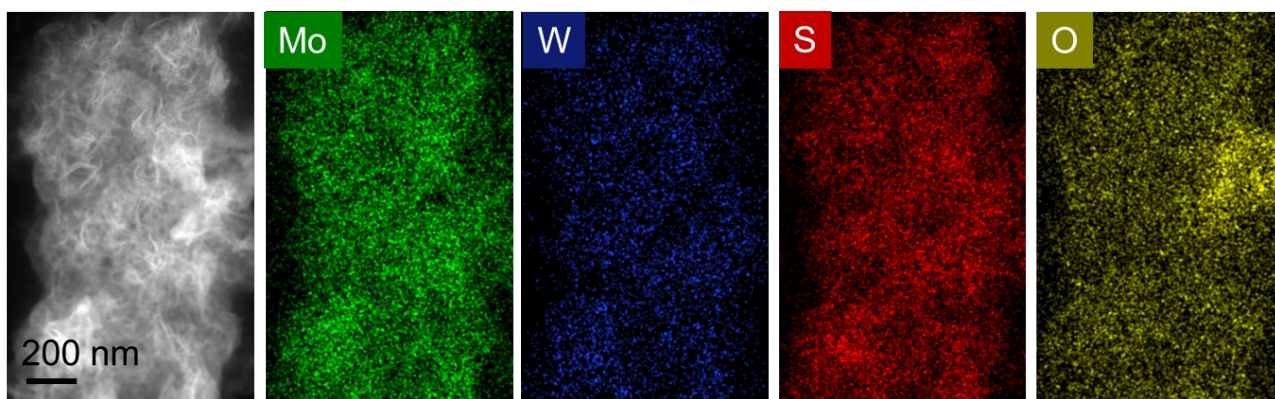

**Figure S13.** Time dependent experiment; HAADF-STEM micrograph of 6 h sulfurized product using non-hydrated  $W_{0.5}Mo_{0.5}O_3$  and corresponding EDS maps showing elemental distribution of Mo, W, S, and O, respectively.

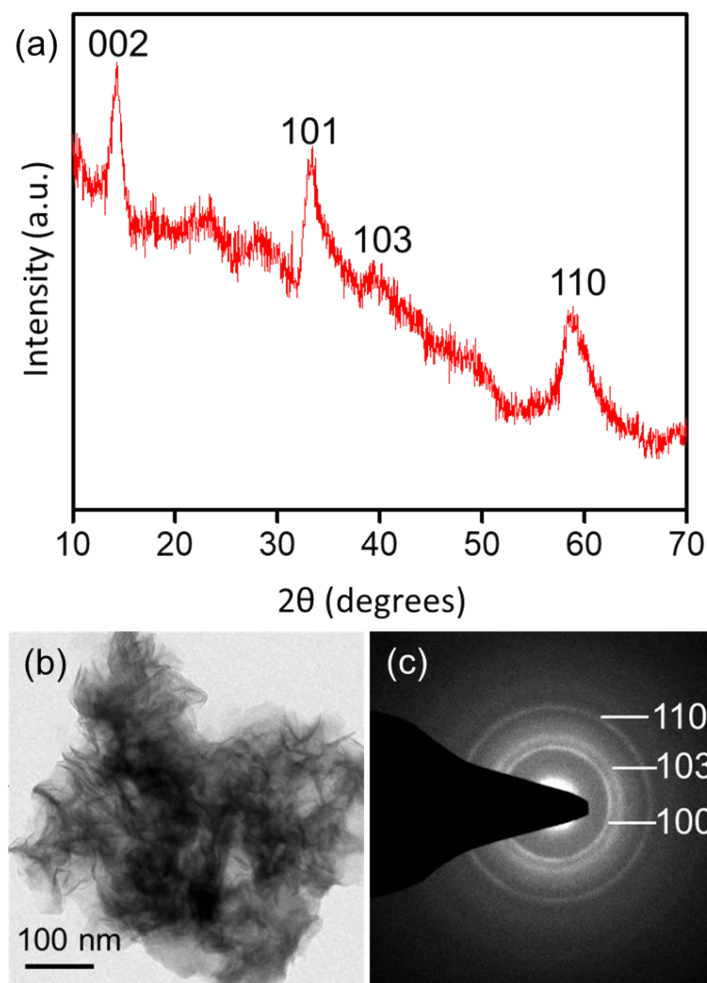

**Figure S14.** (a) Powder XRD pattern of pristine MoS<sub>2</sub> (synthesized separately using one-pot hydrothermal method); (b) BF-TEM micrograph, and (c) Diffraction pattern.

### Characterization of pristine MoS<sub>2</sub>

To correlate the physical and electrochemical properties of the MoS<sub>2</sub> synthesized using selective sulfurization of W<sub>0.5</sub>Mo<sub>0.5</sub>O<sub>3</sub> with that of MoS<sub>2</sub> reported in literature, pristine MoS<sub>2</sub> was prepared using a one-pot hydrothermal method. The characterization of this pristine MoS<sub>2</sub> is shown in **Figure S14**. **Figure S14(a)** depicts the powder XRD pattern of as-synthesized MoS<sub>2</sub>, completely matches with JCPDS card no. 06-0097 with lattice parameters  $a = b = 3.16$  Å,  $c = 12.295$  Å, suggesting phase pure synthesis. In **Figure S14(b-c)**, TEM micrograph and corresponding diffraction pattern is shown. Flower morphology with SAED containing rings pattern, depicts their polycrystalline behavior. The BET surface area and electrochemical properties of these MoS<sub>2</sub> flowers have been compared with MoS<sub>2</sub> prepared by sulfurization of W<sub>0.5</sub>Mo<sub>0.5</sub>O<sub>3</sub> to elucidate the influence of selective sulfurization process on the materials characteristics.

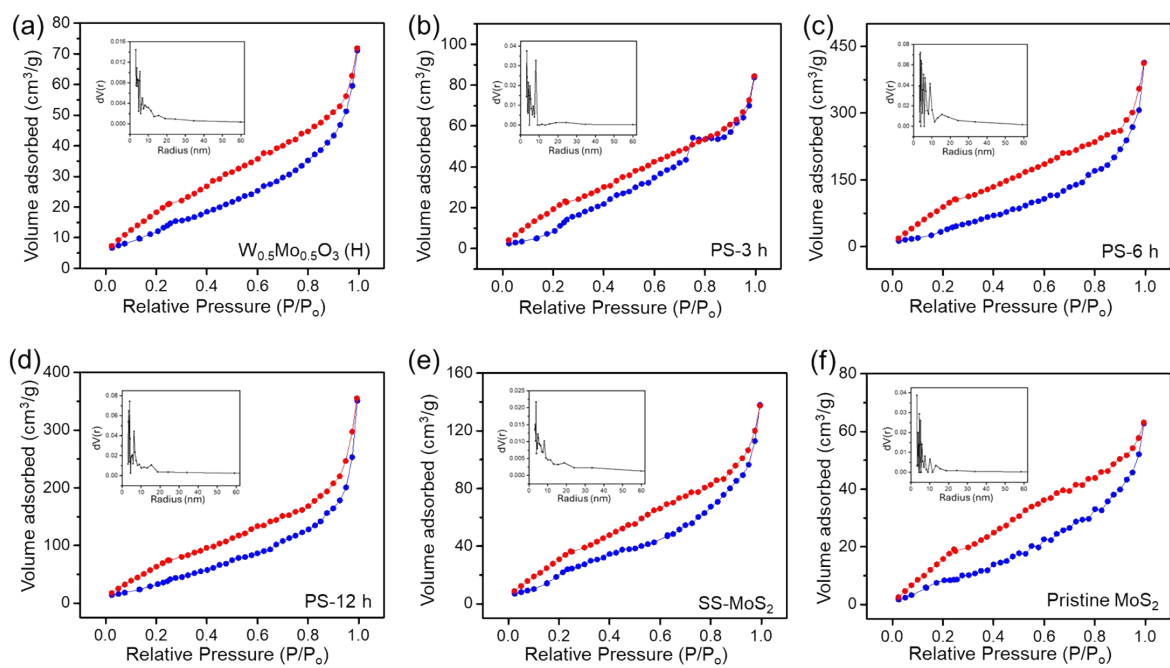

**Figure S15.** Nitrogen adsorption-desorption isotherms (BET plots) of (a)  $W_{0.5}Mo_{0.5}O_3$  (H); (b) PS-3 h; (c) PS-6 h; (d) PS-12 h, (e) SS-MoS<sub>2</sub>; and (f) Pristine MoS<sub>2</sub> (inset: Pore size distribution curves).

**Table S3.** Specific surface area, average pore size and average pore volume values of samples, obtained by BET and BJH method, respectively.

| Sample                                                | Surface area<br>(m <sup>2</sup> /g) | Average Pore<br>size (nm) | Average Pore<br>volume<br>(cm <sup>3</sup> /g) |
|-------------------------------------------------------|-------------------------------------|---------------------------|------------------------------------------------|
| W <sub>0.5</sub> Mo <sub>0.5</sub> O <sub>3</sub> (H) | 53.9                                | 3.15                      | 0.10                                           |
| PS-3 h                                                | 137.2                               | 3.32                      | 0.14                                           |
| PS-6 h                                                | 229.6                               | 3.72                      | 0.65                                           |
| PS-12 h                                               | 172.2                               | 3.94                      | 0.54                                           |
| SS-MoS <sub>2</sub>                                   | 122.1                               | 3.73                      | 0.30                                           |
| Pristine MoS <sub>2</sub>                             | 45.4                                | 3.14                      | 0.11                                           |



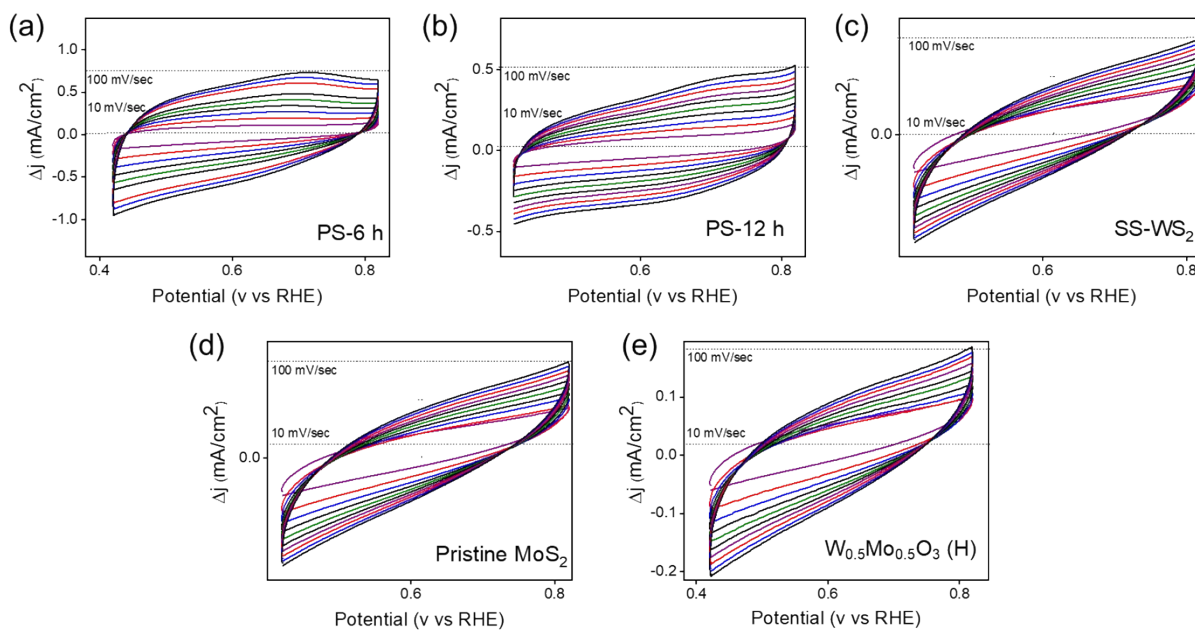

**Figure S16.** Cyclic voltammetric response of samples in the non-faradaic region near to the HER polarisation region in 0.5 M  $\text{H}_2\text{SO}_4$  of (a) PS-6 h; (b) PS-12 h; (c) SS-MoS<sub>2</sub>; (d) Pristine MoS<sub>2</sub> and (e) W<sub>0.5</sub>Mo<sub>0.5</sub>O<sub>3</sub> (H), respectively.

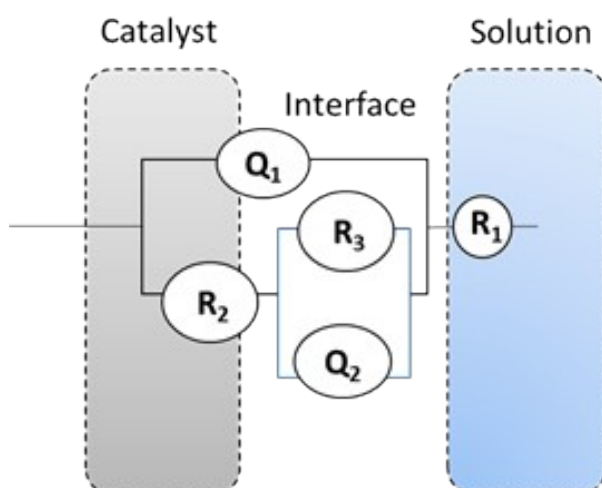

**Figure S17:** Equivalent circuit diagram used in EIS simulation.

**Table S4:** EIS circuit fitting for HER in 0.5 M H<sub>2</sub>SO<sub>4</sub>

| Sample                                                | R1(solution resistance) | R2 (Charge transfer resistance) | R3 (adsorption resistance) |
|-------------------------------------------------------|-------------------------|---------------------------------|----------------------------|
| PS-6 h                                                | 4.6                     | 96.7                            | 989                        |
| PS-12 h                                               | 2.9                     | 51.6                            | 738                        |
| SS-MoS <sub>2</sub>                                   | 10.3                    | 206.1                           | 1224                       |
| W <sub>0.5</sub> Mo <sub>0.5</sub> O <sub>3</sub> (H) | 1.2                     | 541                             | 2725                       |
| Pristine MoS <sub>2</sub>                             | 5.8                     | 271                             | 3538                       |

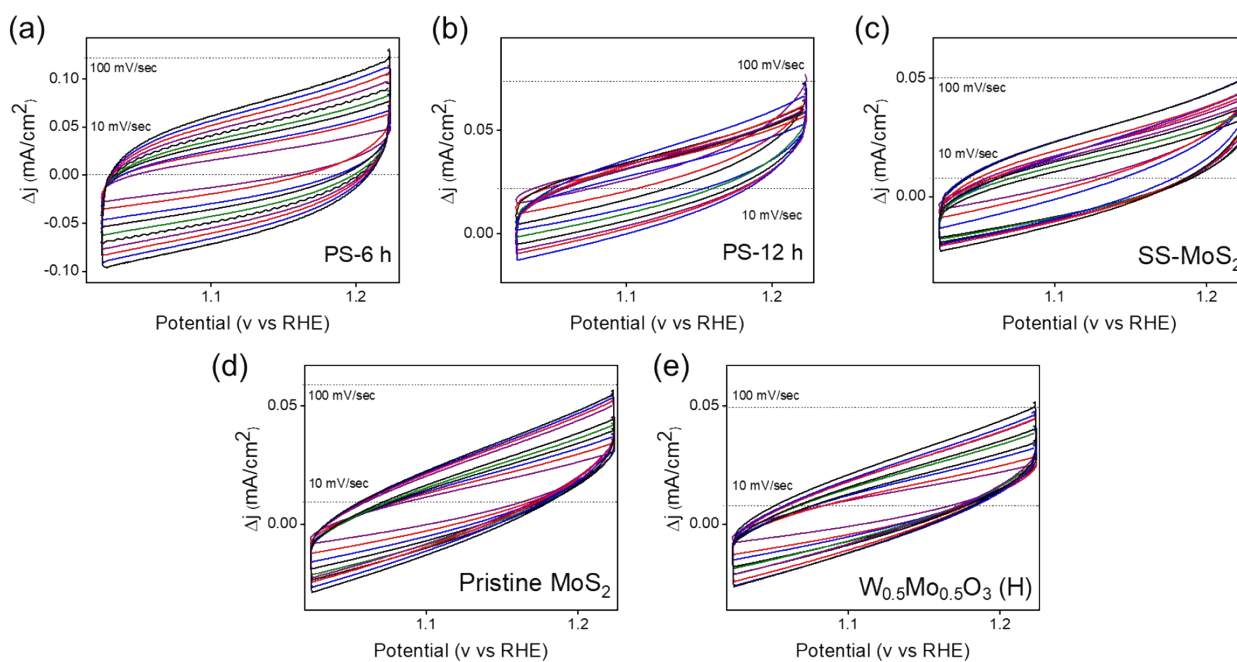**Figure S18.** Cyclic voltammetric response of samples in the non-faradaic region near to the OER polarisation region in 1M KOH of (a) PS-6 h; (b) PS-12 h; (c) SS-MoS<sub>2</sub>; (d) Pristine MoS<sub>2</sub> and (e) W<sub>0.5</sub>Mo<sub>0.5</sub>O<sub>3</sub> (H), respectively.

**Table S5:** EIS circuit fitting for OER in 1 M KOH

| Sample                                                | R1(solution resistance) | R2 (Charge transfer resistance) | R3 (adsorption resistance) |
|-------------------------------------------------------|-------------------------|---------------------------------|----------------------------|
| PS-6 h                                                | 5.5                     | 14.2                            | 2.9                        |
| PS-12 h                                               | 5.6                     | 11.8                            | 9.4                        |
| SS-MoS <sub>2</sub>                                   | 6.3                     | 17.1                            | 18.4                       |
| W <sub>0.5</sub> Mo <sub>0.5</sub> O <sub>3</sub> (H) | 5                       | 26.1                            | 1159                       |
| Pristine MoS <sub>2</sub>                             | 4.6                     | 36.6                            | 4154                       |

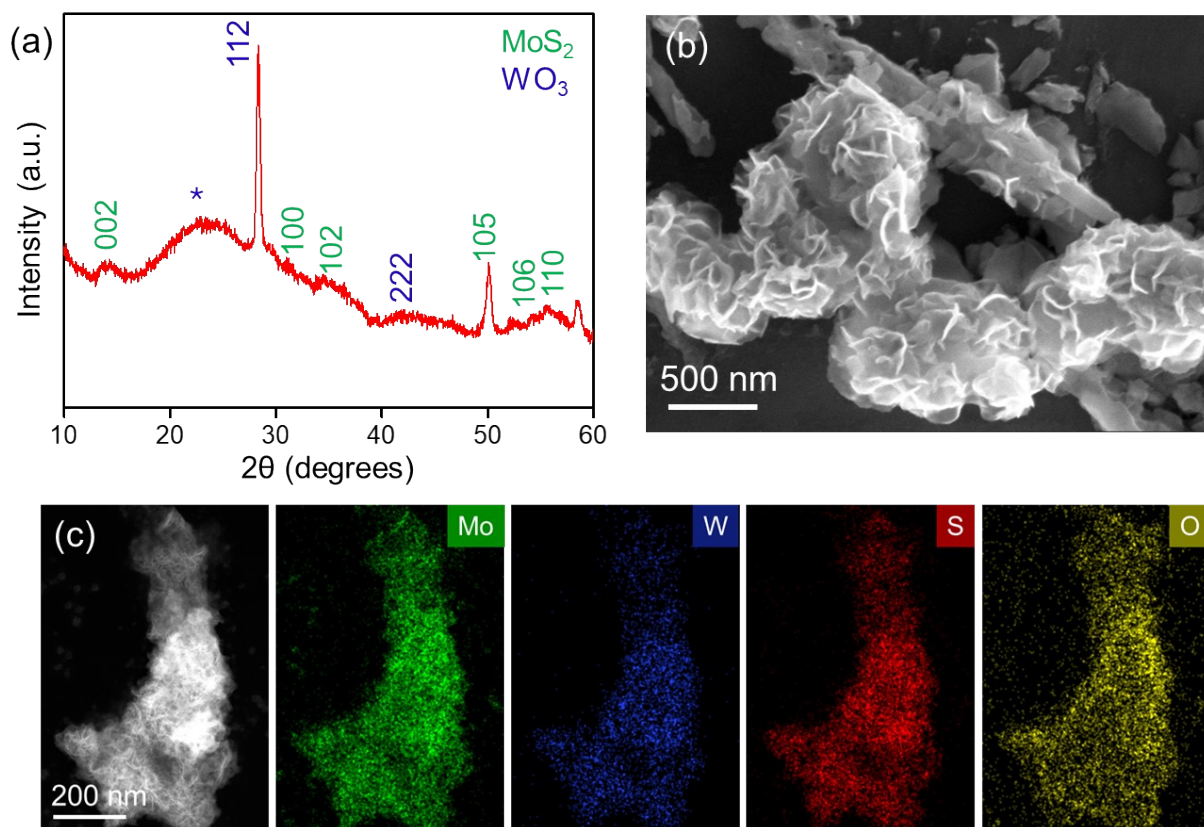

**Figure S19.** Post HER analysis of PS-6h sample; **(a)** PXRD pattern; **(b)** SEM micrograph; **(c)** HAADF-STEM micrograph and corresponding EDS maps of Mo, W, S and O elements in the sample.

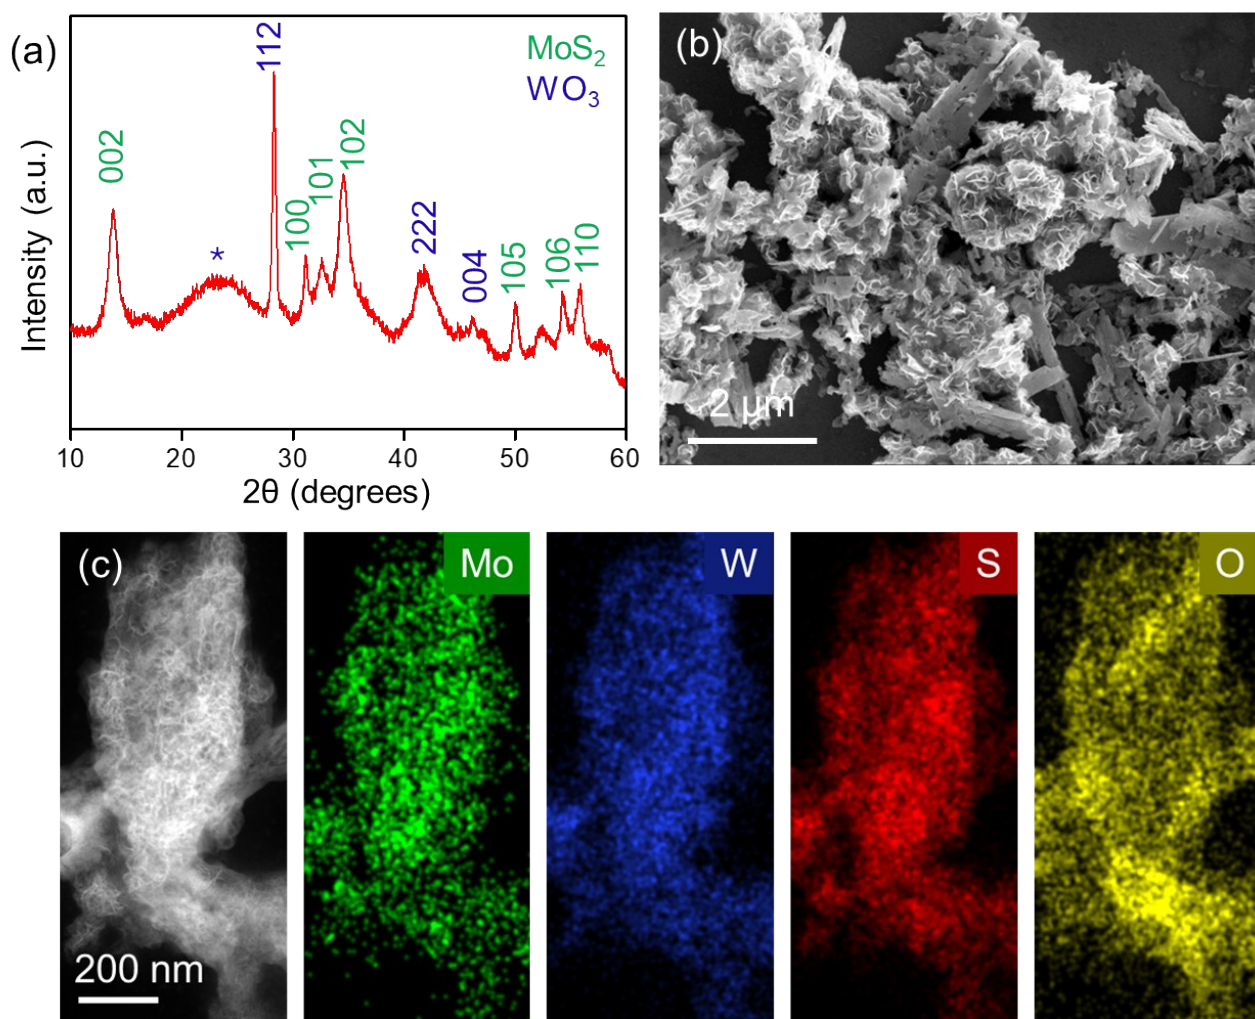

**Figure S20.** Post OER analysis of PS-6h sample; **(a)** PXRD pattern; **(b)** SEM micrograph; **(c)** HAADF-STEM micrograph and corresponding EDS maps of Mo, W, S and O elements in the sample.

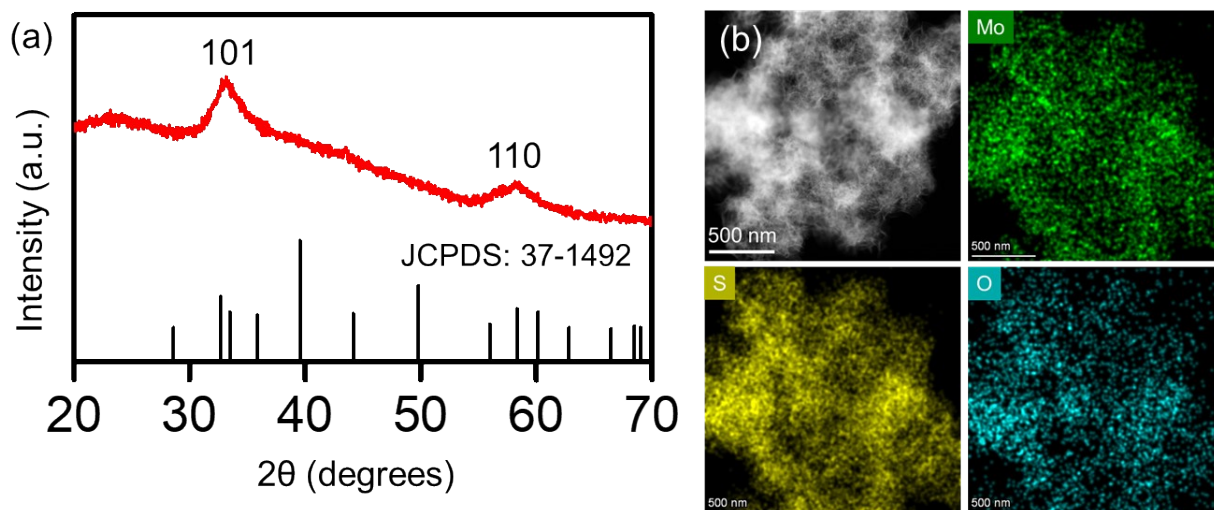

**Figure S21.** Post OER analysis of SS-MoS<sub>2</sub> sample; **(a)** PXRD pattern; **(b)** HAADF-STEM micrograph and corresponding EDS maps of Mo, S, and O elements in the sample.

**Table S6.** Comparison of HER and OER activity of previously reported MoS<sub>2</sub> and its heterostructures with our samples.

| Sample                                                     | Reaction | Electrolyte media                    | Overpotential @ 10 mA/cm <sup>2</sup> (mV) | Tafel slope (mV/dec) | Stability 14h (% activity retention) | Reference |
|------------------------------------------------------------|----------|--------------------------------------|--------------------------------------------|----------------------|--------------------------------------|-----------|
| PS-6 h (MoS <sub>2</sub> -WO <sub>3</sub> heterostructure) | HER      | 0.5 M H <sub>2</sub> SO <sub>4</sub> | 211                                        | 123                  | 95                                   | This work |
| 2H MoS <sub>2</sub>                                        | HER      | 0.5 M H <sub>2</sub> SO <sub>4</sub> | 686                                        | 204                  | -                                    | 1         |
| MoS <sub>2</sub> sheets                                    | HER      | 0.5 M H <sub>2</sub> SO <sub>4</sub> | 420                                        | 138                  | -                                    | 2         |
| Etched MoS <sub>2</sub>                                    | HER      | 0.5 M H <sub>2</sub> SO <sub>4</sub> | 267                                        | 136                  | -                                    | 3         |
| SV-2H MoS <sub>2</sub>                                     | HER      | 0.5 M H <sub>2</sub> SO <sub>4</sub> | 369                                        | 69                   | -                                    | 1         |
| MoS <sub>2</sub> /Nb <sub>2</sub> CT <sub>x</sub>          | HER      | 0.5 M H <sub>2</sub> SO <sub>4</sub> | 138                                        | 94                   | ~70                                  | 4         |
| FeS <sub>2</sub> -MoS <sub>2</sub>                         | HER      | 0.5 M H <sub>2</sub> SO <sub>4</sub> | 136                                        | 82                   | -                                    | 5         |
| Ni-MoS <sub>2</sub>                                        | HER      | 0.5 M H <sub>2</sub> SO <sub>4</sub> | 302                                        | 67                   | -                                    | 6         |

|                                                            |     |                                      |     |     |     |           |
|------------------------------------------------------------|-----|--------------------------------------|-----|-----|-----|-----------|
| 1T-2H MoS <sub>2</sub>                                     | HER | 0.5 M H <sub>2</sub> SO <sub>4</sub> | 212 | 78  | -   | 7         |
| Mo <sub>2</sub> N/CNT                                      | HER | 0.5 M H <sub>2</sub> SO <sub>4</sub> | 218 | 133 | ~80 | 8         |
| MoO <sub>3</sub> -MoS <sub>2</sub>                         | HER | 0.5 M H <sub>2</sub> SO <sub>4</sub> | 200 | 74  | -   | 9         |
| Co-BDC/MoS <sub>2</sub>                                    | HER | 0.5 M H <sub>2</sub> SO <sub>4</sub> | 248 | 86  | ~85 | 10        |
| MoS <sub>2</sub> /Ni QDs                                   | HER | 0.5 M H <sub>2</sub> SO <sub>4</sub> | 450 | 105 | -   | 11        |
| MoS <sub>2</sub> /graphene                                 | HER | 0.5 M H <sub>2</sub> SO <sub>4</sub> | 30  | 67  | -   | 12        |
| MoS <sub>2</sub> ultrathin nanosheets                      | HER | 0.5 M H <sub>2</sub> SO <sub>4</sub> | 300 | 55  | -   | 13        |
| H-MoS                                                      | HER | 0.5 M H <sub>2</sub> SO <sub>4</sub> | 167 | 70  | -   | 14        |
| SV-MoS <sub>2</sub>                                        | HER | 0.5 M H <sub>2</sub> SO <sub>4</sub> | 170 | 60  | -   | 15        |
| PS-6 h (MoS <sub>2</sub> -WO <sub>3</sub> heterostructure) | OER | 1 M KOH                              | 485 | 179 | 87  | This work |
| MoS <sub>2</sub> /Co-N-CN <sub>2</sub>                     | OER | 1 M KOH                              | 442 | 169 | ~72 | 16        |
| Co <sub>9</sub> S <sub>8</sub> @MoS <sub>2</sub>           | OER | 1 M KOH                              | 430 | 61  | -   | 17        |
| Sr <sub>2</sub> Fe <sub>2</sub> O <sub>6</sub> @d          | OER | 0.1M KOH                             | 600 | 60  | -   | 18        |
| Co-CoO/rGO                                                 | OER | 1M KOH                               | 390 | 68  | 97  | 19        |
| MoS <sub>2</sub> /BN                                       | OER | 1M KOH                               | 770 | 190 | -   | 20        |
| BP/NS                                                      | OER | 1M KOH                               | 592 | 308 | -   | 21        |
| BP(Ni <sub>2</sub> Fe <sub>2</sub> )                       | OER | 1M KOH                               | 510 | 252 | -   | 22        |
| MoS <sub>2</sub> /rGO-3%                                   | OER | 1M KOH                               | 250 | 195 | -   | 23        |
| MoO <sub>3</sub>                                           | OER | 1M KOH                               | 644 | 89  | -   | 24        |
| Porous MoO <sub>3</sub>                                    | OER | 1M KOH                               | 510 | 125 | 83  | 25        |
| MoS <sub>2</sub> /NiS <sub>2</sub>                         | OER | 1M KOH                               | 235 | 71  | -   | 26        |
| Ni-Mo-S@CC                                                 | OER | 1M KOH                               | 320 | 88  | -   | 27        |
| Co-Ru 1T MoS <sub>2</sub>                                  | OER | 1M KOH                               | 308 | 55  | -   | 28        |
| Fe/MoS <sub>2</sub> /CoMo <sub>2</sub> S <sub>4</sub>      | OER | 1M KOH                               | 290 | 65  | -   | 29        |
| M <sub>1</sub> S <sub>1</sub>                              | OER | 1M KOH                               | 300 | 220 | -   | 30        |



|                                        |     |        |     |    |    |    |
|----------------------------------------|-----|--------|-----|----|----|----|
| Mo NC@MoS <sub>2</sub>                 | OER | 1M KOH | 390 | 72 | -  | 31 |
| MoS <sub>2</sub> /COF-C <sub>4</sub> N | OER | 1M KOH | 349 | 64 | 79 | 32 |

## References

- 1 C. Gu, T. Sun, Z. Wang, S. Jiang and Z. Wang, *Small Methods*, 2023, **7**, 2201529.
- 2 X. Yin, Y. Li, H. Meng and W. Wu, *Appl. Surf. Sci.*, 2019, **486**, 362–370.
- 3 R. Zhang, M. Zhang, H. Yang, G. Li, S. Xing, M. Li, Y. Xu, Q. Zhang, S. Hu, H. Liao and Y. Cao, *Small Methods*, 2021, **5**, 2100612.
- 4 L. Hu, Y. Sun, S.-J. Gong, H. Zong, K. Yu and Z. Zhu, *New J. Chem.*, 2020, **44**, 7902–7911.
- 5 X. Zhao, X. Ma, Q. Lu, Q. Li, C. Han, Z. Xing and X. Yang, *Electrochim. Acta*, 2017, **249**, 72–78.
- 6 P. Sundara Venkatesh, N. Kannan, M. Ganesh Babu, G. Paulraj and K. Jeganathan, *Int. J. Hydrogen Energy*, 2022, **47**, 37256–37263.
- 7 Z. Hong, W. Hong, B. Wang, Q. Cai, X. He and W. Liu, *Chem. Eng. J.*, 2023, **460**, 141858.
- 8 M. Meng, H. Yan, Y. Jiao, A. Wu, X. Zhang, R. Wang and C. Tian, *RSC Adv.*, 2016, **6**, 29303–29307.
- 9 X. Hou, A. Mensah, M. Zhao, Y. Cai and Q. Wei, *Appl. Surf. Sci.*, 2020, **529**, 147115.
- 10 D. Zhu, J. Liu, Y. Zhao, Y. Zheng and S.-Z. Qiao, *Small*, 2019, **15**, 1805511.
- 11 B. Lai, S. C. Singh, J. K. Bindra, C. S. Saraj, A. Shukla, T. P. Yadav, W. Wu, S. A. McGill, N. S. Dalal, A. Srivastava and C. Guo, *Mater. Today Chem.*, 2019, **14**, 100207.
- 12 L. Ma, Y. Hu, G. Zhu, R. Chen, T. Chen, H. Lu, Y. Wang, J. Liang, H. Liu, C. Yan, Z. Tie, Z. Jin and J. Liu, *Chem. Mater.*, 2016, **28**, 5733–5742.
- 13 J. Xie, J. Zhang, S. Li, F. Grote, X. Zhang, H. Zhang, R. Wang, Y. Lei, B. Pan and Y. Xie, *J. Am. Chem. Soc.*, 2013, **135**, 17881–17888.
- 14 J. Zhang, S. Liu, H. Liang, R. Dong and X. Feng, *Adv. Mater.*, 2015, **27**, 7426–7431.
- 15 H. Li, C. Tsai, A. L. Koh, L. Cai, A. W. Contryman, A. H. Fragapane, J. Zhao, H. S. Han, H. C. Manoharan, F. Abild-Pedersen, J. K. Nørskov and X. Zheng, *Nat. Mater.*, 2016, **15**, 48–53.
- 16 X. Hou, H. Zhou, M. Zhao, Y. Cai and Q. Wei, *ACS Sustain. Chem. Eng.*, 2020, **8**, 5724–5733.
- 17 H. Zhu, J. Zhang, R. Yanzhang, M. Du, Q. Wang, G. Gao, J. Wu, G. Wu, M. Zhang, B. Liu, J. Yao and X. Zhang, *Adv. Mater.*, 2015, **27**, 4752–4759.



- 18 R. K. Hona and F. Ramezanipour, *Angew. Chemie Int. Ed.*, 2019, **58**, 2060–2063.
- 19 X. Liu, W. Liu, M. Ko, M. Park, M. G. Kim, P. Oh, S. Chae, S. Park, A. Casimir, G. Wu and J. Cho, *Adv. Funct. Mater.*, 2015, **25**, 5799–5808.
- 20 J. Hou, Y. Sun, Y. Wu, S. Cao and L. Sun, *Adv. Funct. Mater.*, 2018, **28**, 1704447.
- 21 Q. Xu, J. Zhang, H. Zhang, L. Zhang, L. Chen, Y. Hu, H. Jiang and C. Li, *Energy Environ. Sci.*, 2021, **14**, 5228–5259.
- 22 X. Deng, R. Zhang, Q. Li, W. Gu and L. Hao, *ChemistrySelect*, 2022, **7**, e202200091.
- 23 M. S. Khan, T. Noor, E. Pervaiz, N. Iqbal and N. Zaman, *RSC Adv.*, 2024, **14**, 12742–12753.
- 24 S. D. Raut, N. M. Shinde, B. G. Ghule, S. Kim, J. J. Pak, Q. Xia and R. S. Mane, *Chem. Eng. J.*, 2022, **433**, 133627.
- 25 M. Zhang, R. Li, D. Hu, X. Huang, Y. Liu and K. Yan, *J. Electroanal. Chem.*, 2019, **836**, 102–106.
- 26 J. Bao, Y. Zhou, Y. Zhang, X. Sheng, Y. Wang, S. Liang, C. Guo, W. Yang, T. Zhuang and Y. Hu, *J. Mater. Chem. A*, 2020, **8**, 22181–22190.
- 27 Y. Wang, W. Sun, X. Ling, X. Shi, L. Li, Y. Deng, C. An and X. Han, *Chem. – A Eur. J.*, 2020, **26**, 4097–4103.
- 28 I. S. Kwon, T. T. Debela, I. H. Kwak, Y. C. Park, J. Seo, J. Y. Shim, S. J. Yoo, J.-G. Kim, J. Park and H. S. Kang, *Small*, 2020, **16**, 2000081.
- 29 Y. Guo, J. Tang, J. Henzie, B. Jiang, W. Xia, T. Chen, Y. Bando, Y.-M. Kang, M. S. A. Hossain, Y. Sugahara and Y. Yamauchi, *ACS Nano*, 2020, **14**, 4141–4152.
- 30 B. Chen, P. Hu, F. Yang, X. Hua, F. F. Yang, F. Zhu, R. Sun, K. Hao, K. Wang and Z. Yin, *Small*, 2023, **19**, 2207177.
- 31 I. S. Amiin, Z. Pu, X. Liu, K. A. Owusu, H. G. R. Monestel, F. O. Boakye, H. Zhang and S. Mu, *Adv. Funct. Mater.*, 2017, **27**, 1702300.
- 32 N. Zhang, Z. Yang, W. Liu, F. Zhang and H. Yan, *Catalysts*, , DOI:10.3390/catal13010090.
